# Supplementary material for: Electrochemical performance of cobalt hydroxide nanosheets formed by the delamination of layered cobalt hydroxide in water
Source: Royal Society of Chemistry journal article supplement (doi:10.1039/c4dt00141a), 2014-01-01

## ELECTRONIC SUPPLEMENTARY INFORMATION

### **Electrochemical performance of cobalt hydroxide nanosheets formed by the delamination of layered cobalt hydroxide in water**

Barbora Schneiderová,<sup>a,b</sup> Jan Demel,<sup>a</sup> Josef Pleštil,<sup>c</sup> Hana Tarábková,<sup>d</sup> Jan Bohuslav,<sup>d,e</sup> and Kamil Lang<sup>\*a</sup>

<sup>a</sup> *Institute of Inorganic Chemistry of the AS CR, v. v. i., Husinec-Řež 1001, 250 68 Řež, Czech Republic*

<sup>b</sup> *Faculty of Science, Charles University in Prague, Hlavova 2030, 128 43 Praha 2, Czech Republic*

<sup>c</sup> *Institute of Macromolecular Chemistry of the AS CR, v. v. i., Heyrovského nám. 2, 162 06 Praha 6, Czech Republic*

<sup>d</sup> *J. Heyrovský Institute of Physical Chemistry of the AS CR, v. v. i., Dolejškova 3, 182 23 Praha 8, Czech Republic*

<sup>e</sup> *Institute of Chemical Technology, Prague, Technická 5, 166 28 Praha 6, Czech Republic*

\*Corresponding author: Email address: lang@iic.cas.cz, Tel: +420 26617 2193, Fax: +420 22094 1502.

## Contents

|               |                                                                                                                                                  |
|---------------|--------------------------------------------------------------------------------------------------------------------------------------------------|
| Table S1.     | Conditions of syntheses and characterizing data of LCoH-DS.                                                                                      |
| Table S2.     | Charge reversibility of the LCoH-Lactate electrodes.                                                                                             |
| Figure S1.    | Powder XRD patterns of LCoH-DS.                                                                                                                  |
| Figure S2.    | FTIR spectra of LCoH-DS and LCoH-Lactate.                                                                                                        |
| Figure S3,S4. | Thermal analyses of LCoH-DS and LCoH-Lactate.                                                                                                    |
| Figure S5.    | UV/vis absorption spectrum of the LCoH-Lactate colloid and self-standing film.                                                                   |
| Figure S6,S7. | SAXS curves of the aqueous dispersions.                                                                                                          |
| Figure S8.    | AFM amplitude image (tapping mode) of the drop-casted deposit on the basal plane HOPG.                                                           |
| Figure S9.    | Dependence of the peak current <i>vs.</i> potential scan rate ( $\nu$ ) for the spin-coated cobalt hydroxide deposits on the basal plane HOPG.   |
| Figure S10.   | Dependence of the peak potential <i>vs.</i> potential scan rate ( $\nu$ ) for the spin-coated cobalt hydroxide deposits on the basal plane HOPG. |
| Figure S11.   | Cyclic voltammetry of the spin-coated cobalt hydroxide deposits on the basal plane HOPG.                                                         |

**Table S1.** Conditions of syntheses and characterizing data of LCoH-DS.

| Sample               | HMT/eq | T/°C | Time/h | Solvent               | d / Å | Colour | Molar ratio Co/DS <sup>b</sup> |
|----------------------|--------|------|--------|-----------------------|-------|--------|--------------------------------|
| <b>1</b>             | 20     | 90   | 2      | H <sub>2</sub> O,MeOH | 24.1  | green  | 0.30                           |
| <b>2</b>             | 20     | 90   | 2      | H <sub>2</sub> O,BuOH | 19.5  | beige  | 0.25                           |
| <b>3</b>             | 20     | 90   | 1      | H <sub>2</sub> O,BuOH | 22.6  | beige  | 0.27                           |
| <b>4</b>             | 10     | 90   | 2      | H <sub>2</sub> O,BuOH | 19.9  | beige  | 0.25                           |
| <b>5</b>             | 3      | 90   | 2      | H <sub>2</sub> O,BuOH | 23.1  | green  | 0.27                           |
| <b>6<sup>a</sup></b> | 3      | 100  | 24     | H <sub>2</sub> O      | 26.1  | green  | 0.28                           |

<sup>a</sup> Reaction was performed in an autoclave.

<sup>b</sup> Composition of synthesized LCoH-DS was estimated using elemental analyses data; molar ratio of Co/HMT was 1/0.04.

**Table S2.** Charge reversibility expressed as the ratio of anodic ( $Q_a$ ) and cathodic ( $Q_c$ ) charges ( $Q_a/Q_c$ ) was elucidated from cyclic voltammograms of the spin-coated cobalt hydroxide electrodes vs. potential scan rate ( $v$ ).

| $v/\text{mV s}^{-1}$ | $Q_a/Q_c^a$ | $Q_a/Q_c^b$ |
|----------------------|-------------|-------------|
| 10                   | 1.01        | 1.01        |
| 20                   | 0.75        | 1.23        |
| 50                   | 0.78        | 0.88        |
| 100                  | 0.77        | 0.87        |
| 200                  | 0.93        | 0.84        |

<sup>a</sup> Deposit prepared by spin-coating using the 10 mg ml<sup>-1</sup> dispersion.

<sup>b</sup> Deposit prepared by spin-coating using the 2 mg ml<sup>-1</sup> dispersion.

**Figure S1.** Examples of powder XRD patterns recorded for LCoH-DS **6** (a) and LCoH-DS **4** (b). The sample LCoH-DS **6** has a minor contribution of a more extended phase with a basal spacing of 33.6 Å (●).

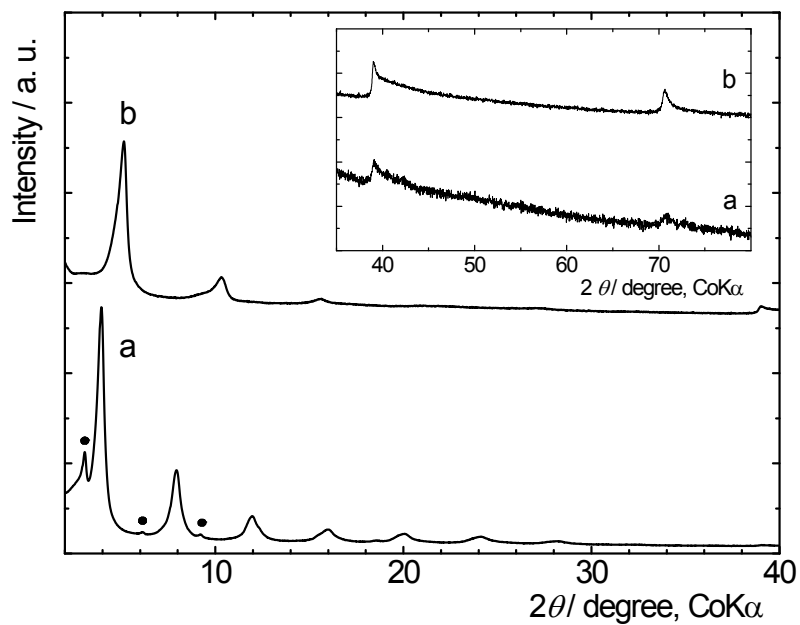

**Figure S2.** FTIR spectra of LCoH-DS **4** (A) and LCoH-Lactate (B). The spectra are vertically shifted and labelling refers to the discussion below.

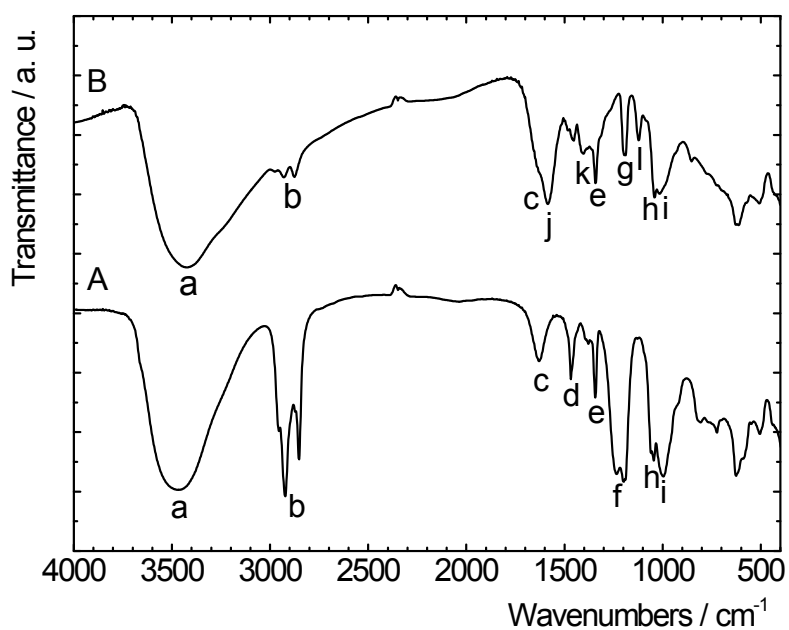

FTIR spectra of LCoH-DS and LCoH-Lactate display vibrations of the intercalated anions, water molecules (the OH stretching vibrations at approximately  $3440\text{ cm}^{-1}$  (a) and the OH deformation vibration at  $1633\text{ cm}^{-1}$  (c)), and the skeletal vibrations of cobalt hydroxide (below  $1000\text{ cm}^{-1}$ ). Intercalated DS anions display the stretching vibrations of the C-H bonds in the range  $3000 - 2780\text{ cm}^{-1}$  (b), the bending vibration of the organic chain at  $1468\text{ cm}^{-1}$  (d), and the sulphate vibrations at  $1234$  and  $1200$  (f),  $1045$  (h), and  $997\text{ cm}^{-1}$  (i). The traces of remaining HMT are indicated by the vibration at  $1341\text{ cm}^{-1}$  (e), the other bands overlap with the signals of the sulphate groups.

Anion exchange of DS with the lactate anion is accompanied by the appearance of the stretching C-OH vibrations at  $1120\text{ cm}^{-1}$  (l) and the asymmetric and symmetric stretching modes of the lactate carboxyl group at  $1587\text{ cm}^{-1}$  (j) and  $1405\text{ cm}^{-1}$  (k), respectively. The peaks at  $2929\text{ cm}^{-1}$  and  $2875\text{ cm}^{-1}$  (b),  $1189\text{ cm}^{-1}$  (g), and the peaks (h, i) indicate the minor presence of HMT and DS, as was also confirmed by elemental analyses.

**Figure S3.** TGA/DTA/MS curves and the evolution of gases for LCoH-DS 4.

The measurement was performed in a synthetic air atmosphere (flow rate 30 mL min<sup>-1</sup>) from 30 to 1100 °C with a heating rate of 5 °C min<sup>-1</sup>.

The thermal behaviour of all the prepared samples is similar.

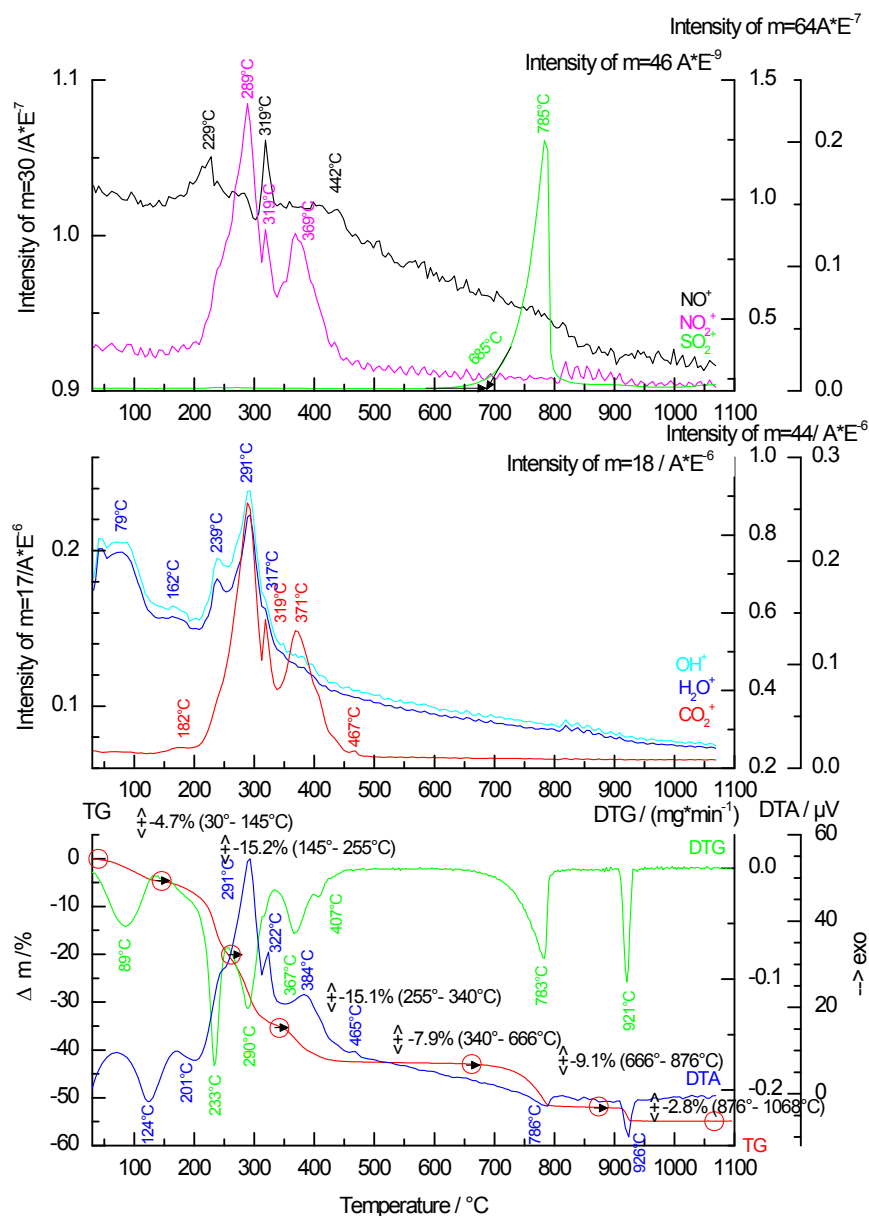

**Figure S4.** TGA/DTA curves for LCoH-Lactate.

The measurement was performed in a synthetic air atmosphere (flow rate 30 mL min<sup>-1</sup>) from 30 to 1100 °C with a heating rate of 5 °C min<sup>-1</sup>.

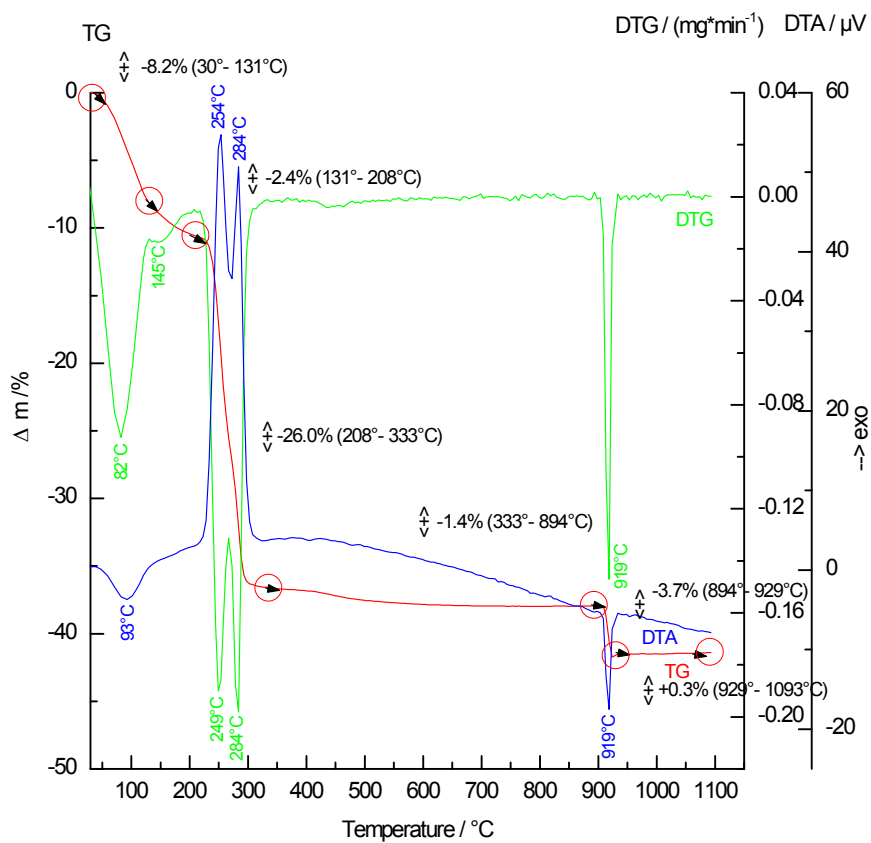

**Figure S5.** UV/vis absorption spectra of the LCoH-Lactate dispersion (a) and self-standing film (b). Spectra are vertically shifted.

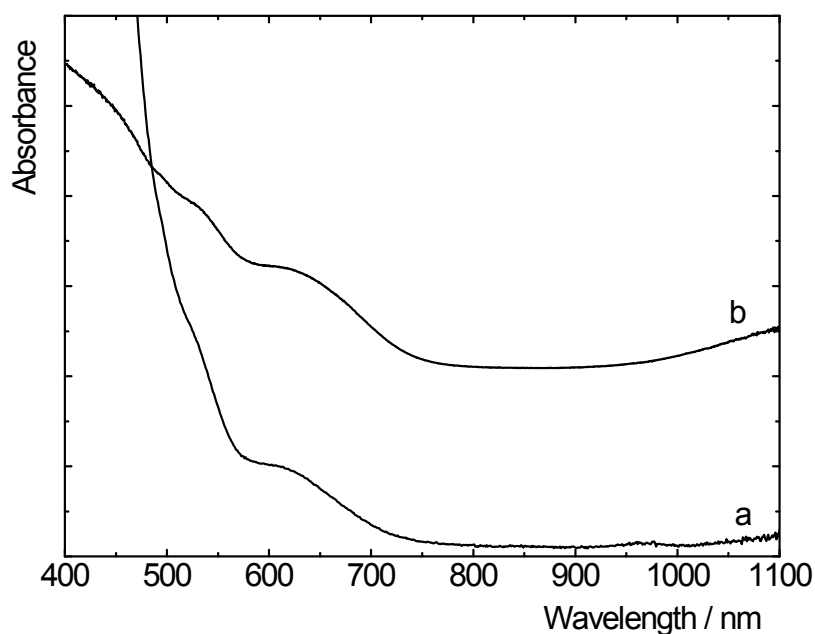

**Figure S6.** SAXS curves of the aqueous nanosheet dispersions were corrected for scattering from an empty capillary and solvent, intraparticle interference, and were normalized to unit concentration (1 - 4 mg mL<sup>-1</sup>).

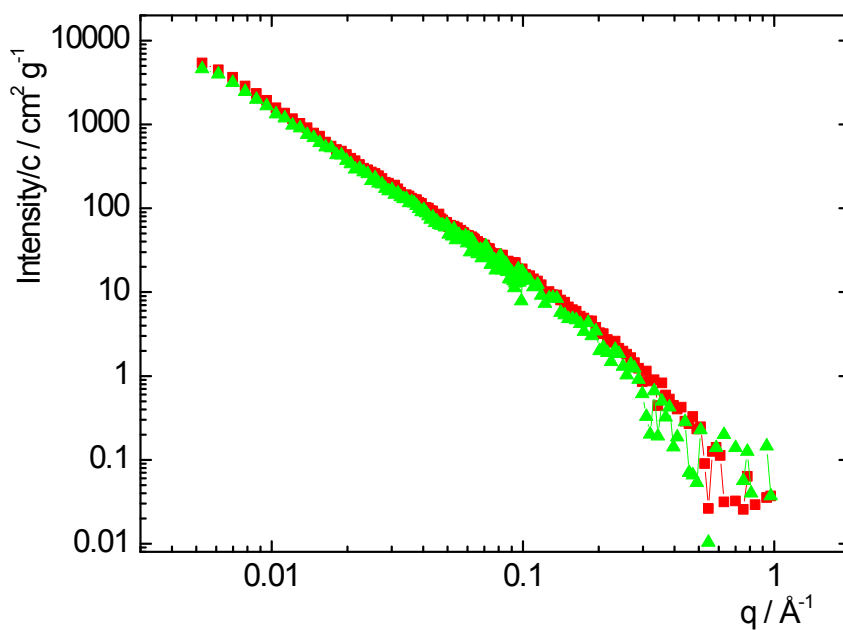

**Figure S7.** SAXS curve of the aqueous LCoH-Lactate dispersion ( $4 \text{ mg mL}^{-1}$ ). The red curve is a fitting scattering function of a model planar particle.

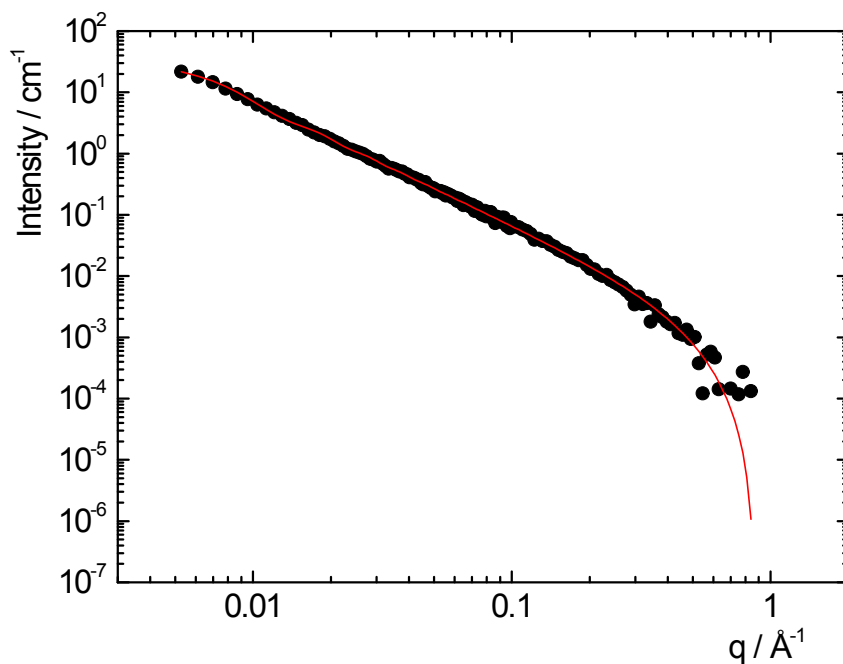

**Figure S8.** (A) AFM amplitude image (tapping mode) of the drop-casted deposit on the basal plane HOPG that was prepared from the aqueous dispersion of the LCoH-Lactate nanosheets ( $2 \text{ mg mL}^{-1}$ ); (B) the same after repetitive potential cycling (from  $-800 \text{ mV}$  to  $+500 \text{ mV}$  vs. SCE) in aqueous  $1 \text{ M KOH}$  solution.

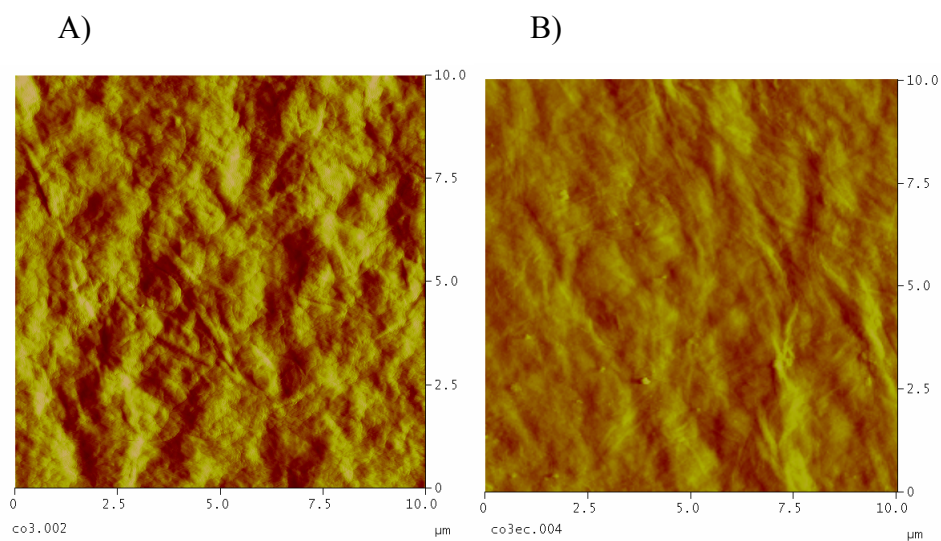

**Figure S9.** Dependence of the peak current ( $I_a$  is the anodic peak current;  $I_c$  is the cathodic peak current) vs. potential scan rate ( $\nu$ ) for the spin-coated cobalt hydroxide deposits on HOPG. Measurements (A) and (B) represent the deposits prepared using 10 and 2 mg mL<sup>-1</sup> nanosheet dispersions, respectively.

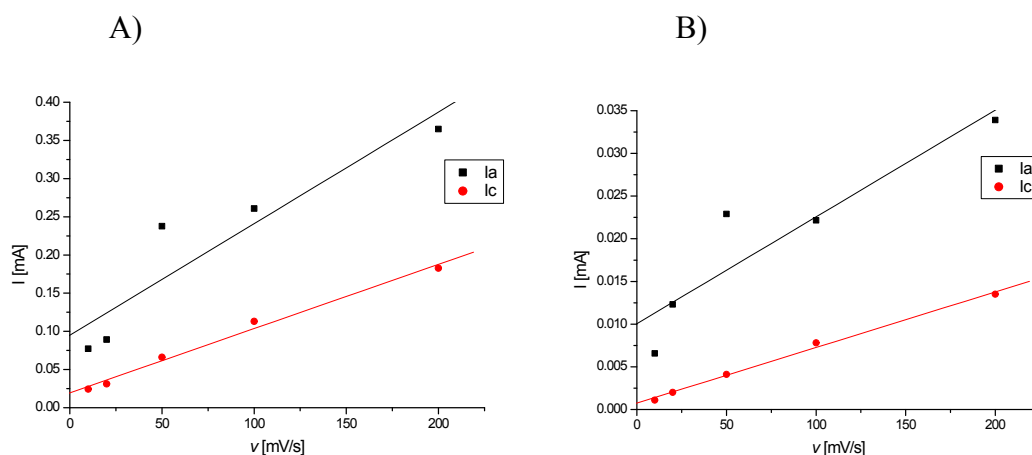

**Figure S10.** Dependence of the peak potential ( $E_a$  is the anodic peak potential;  $E_c$  is the cathodic peak current) vs. potential scan rate ( $\nu$ ) for the spin-coated cobalt hydroxide deposits on the basal plane HOPG. Measurements (A) and (B) represent the deposits prepared using 10 and 2 mg mL<sup>-1</sup> nanosheet dispersions, respectively. Potentials are related to the saturated calomel reference electrode (SCE).

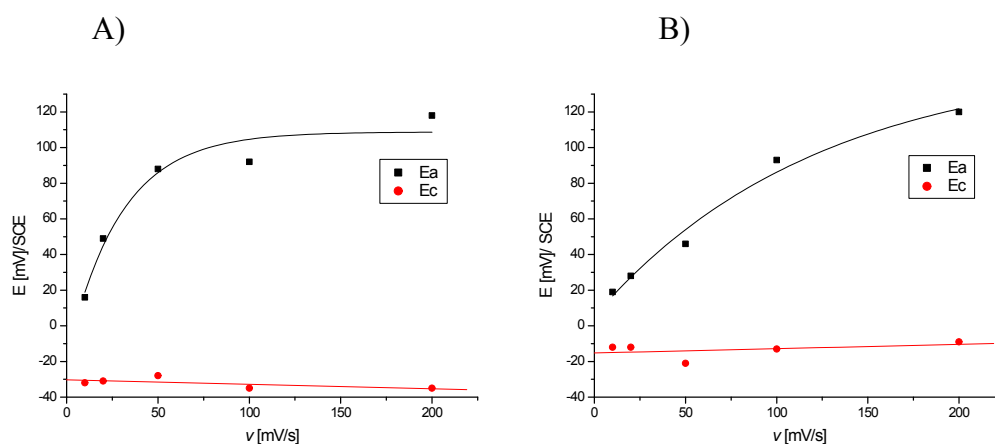

**Figure S11.** Cyclic voltammetry of the spin-coated nanosheet deposits on the basal plane HOPG. Voltammetry was performed in aqueous 1 M KOH electrolyte deoxygenated with Ar. Scan rate was 100 mV s<sup>-1</sup>. Measurements (A) and (B) represent the deposits prepared using 10 and 2 mg mL<sup>-1</sup> dispersions, respectively. The potentials are related to SCE.

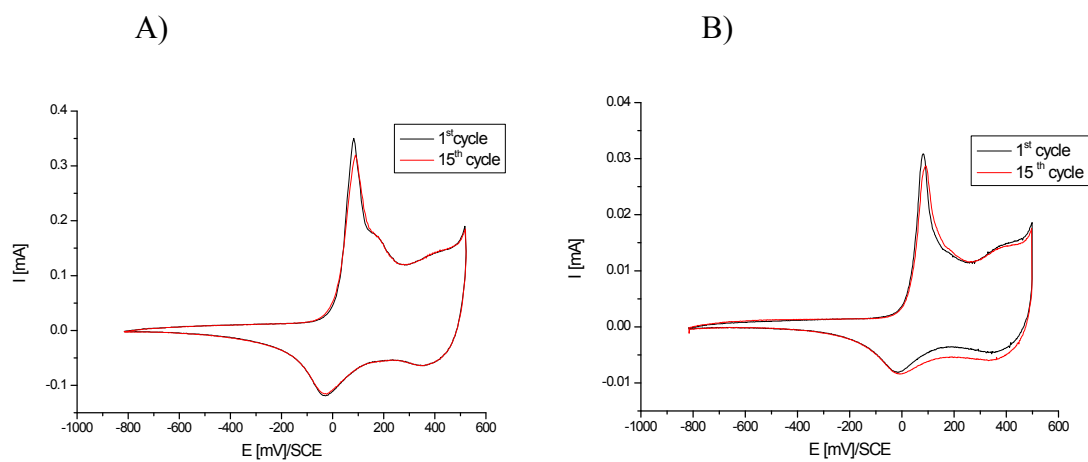

Supplement: c4dt00141a1.pdf [file c4dt00141a1.pdf]
